# Supplementary material for: Assessment of Cellular Responses after Short- and Long-Term Exposure to Silver Nanoparticles in Human Neuroblastoma (SH-SY5Y) and Astrocytoma (D384) Cells
Source: Hindawi journal article supplement (doi:10.1155/2014/259765), 2014-01-01

## **Supplementary Materials**

### **Figure 3 suppl data**

#### **Figure 3 Supplement data**

Membrane integrity evaluation after 4-48 h exposure to increasing concentrations of AgNP (1-100  $\mu\text{g/ml}$ ). Representative images of randomly selected microscopic fields of cells (SH-SY5Y, D384, or A549) stained with calcein-AM/PI after 4 (A), 24 (B) and 48 (C) h exposure to increasing concentrations (1-100  $\mu\text{g/ml}$ ) of AgNPs. Green fluorescence patterns of both cerebral cell lines were similar to the controls at doses ranging 1 to 25  $\mu\text{g/ml}$  at time points (4, 24 and 48 h). A strong decrease in cell viability was observed as evidenced by the presence of numerous red coloured cells (indicating damage to the cell membrane) at the highest doses (50-100  $\mu\text{g/ml}$ ). After 24 and 48 h, the cytotoxic effect of AgNPs was exacerbated. Fluorescence images of A549 cells (A, B, C) showed uniformly diffused green fluorescence, and normal cell morphology for all treatment concentrations (1-100  $\mu\text{g/ml}$ ), was observed a slight decrease of cell viability after 48 h exposure only (scale bar 100  $\mu\text{m}$ ).

**A****AgNP Concentration ( $\mu\text{g/ml}$ )****1****10****25****50****100****SH-SY5Y  
Cells**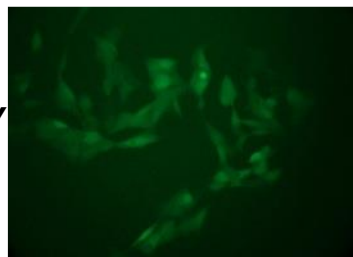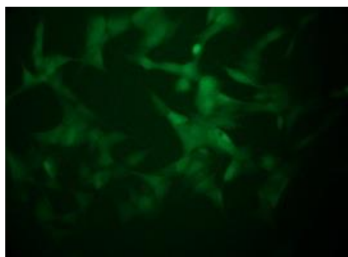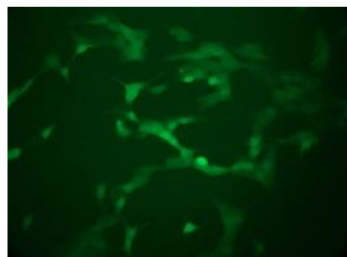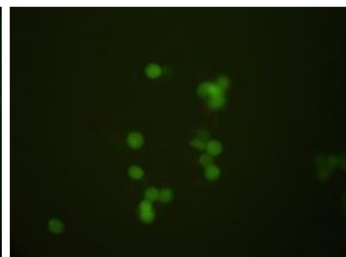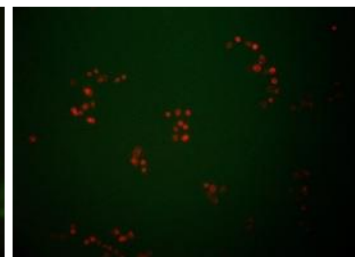**D384  
Cells**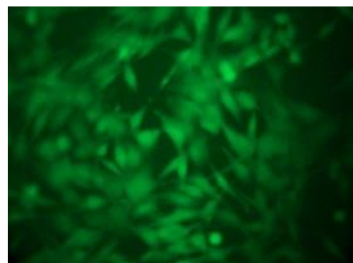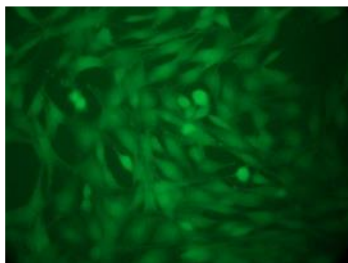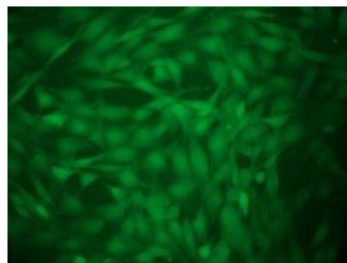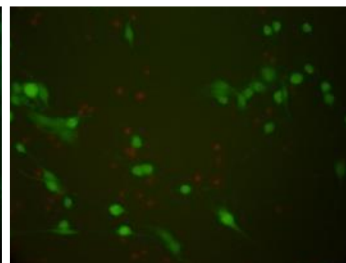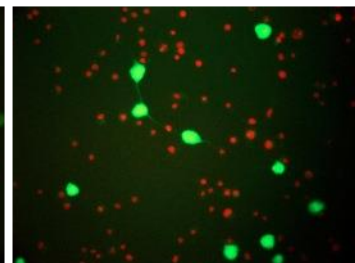**A549  
cells**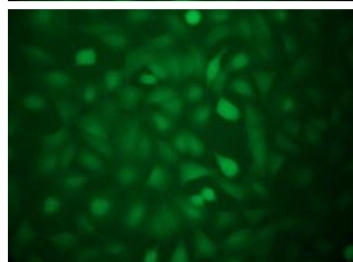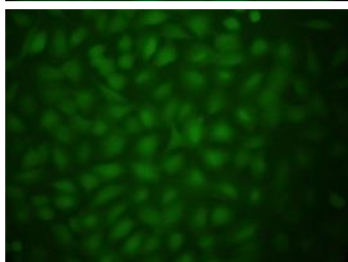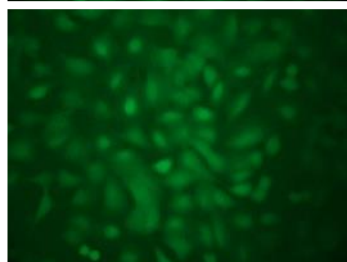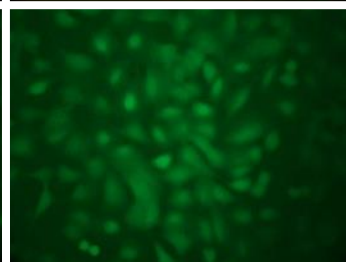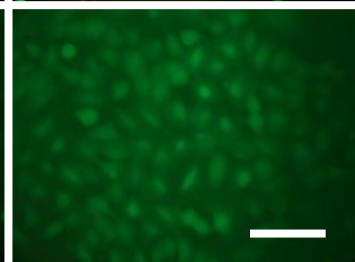

**B****AgNP Concentration ( $\mu\text{g/ml}$ )****10****25****50****100****SH-SY5Y  
Cells**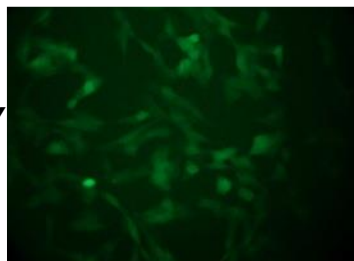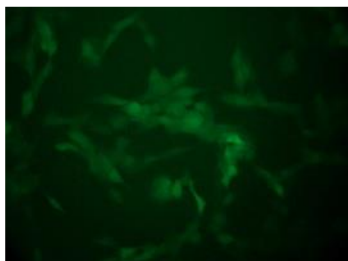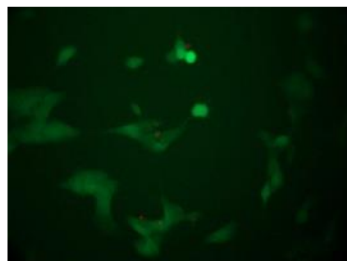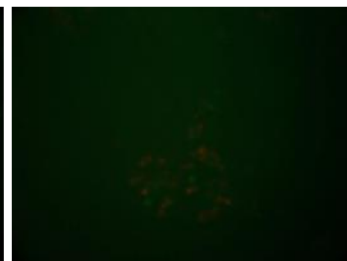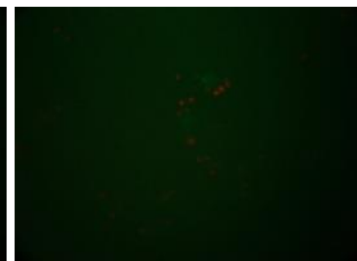**D384  
Cells**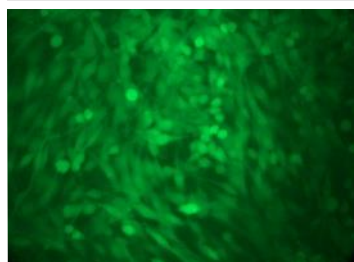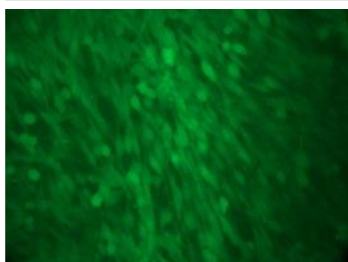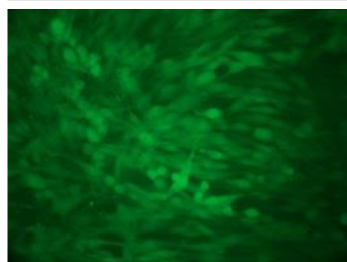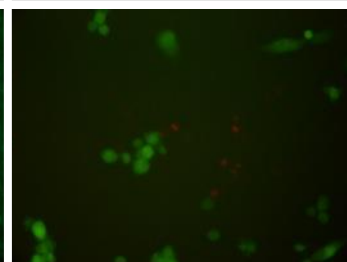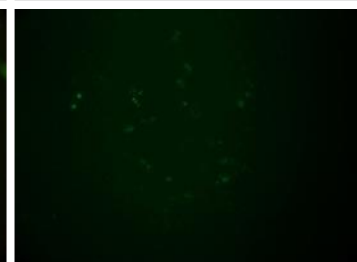**A549  
cells**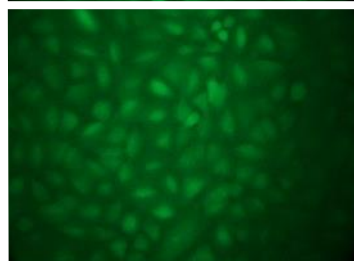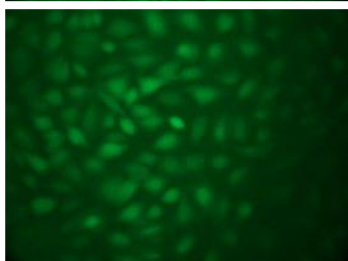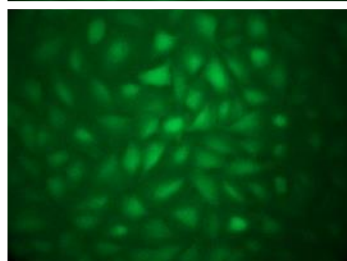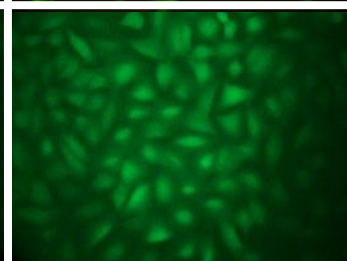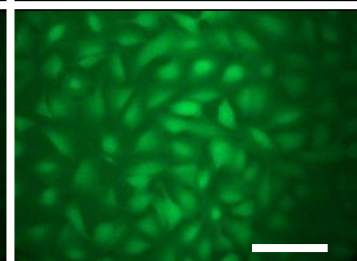

**C****AgNP Concentration ( $\mu\text{g/ml}$ )****1****10****25****50****100****SH-SY5Y  
Cells**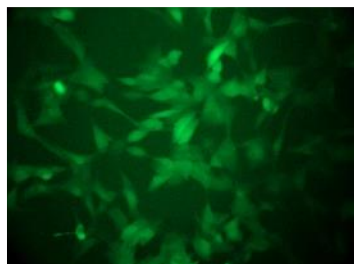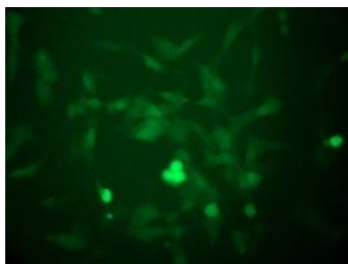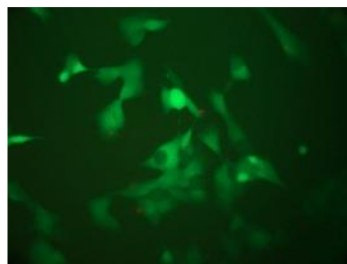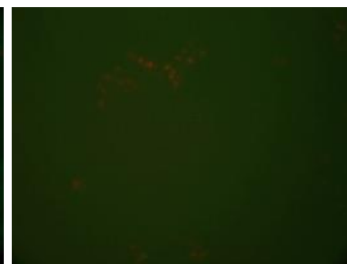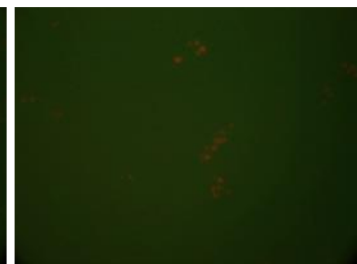**D384  
Cells**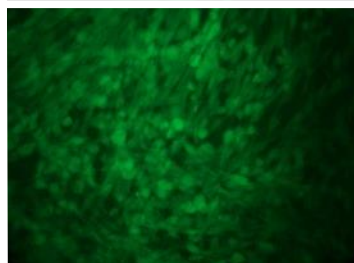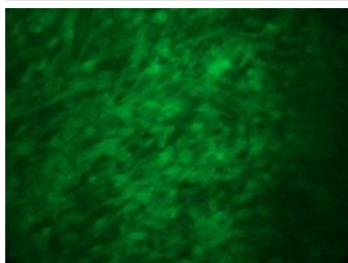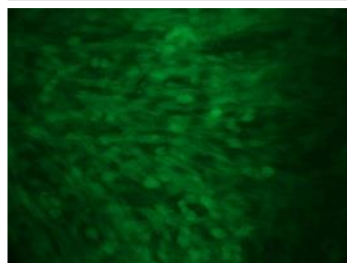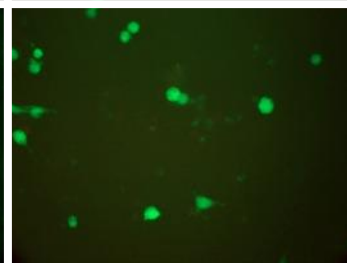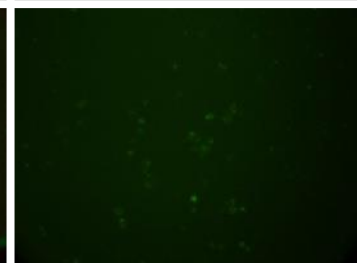**A549  
cells**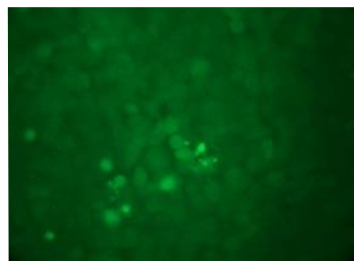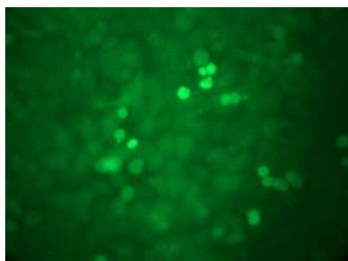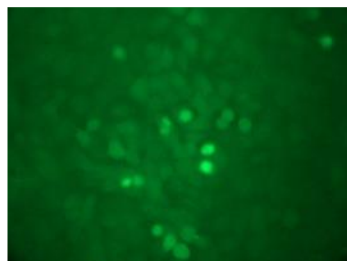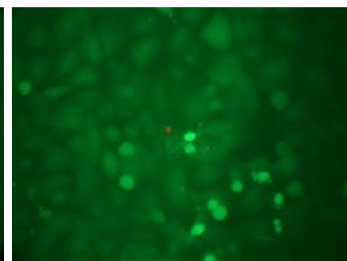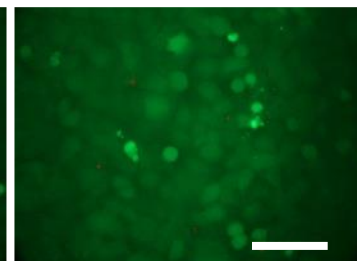

Supplement: f1 [file 259765.f1.pdf]
